# Supplementary material for: A binary metal organic framework derived hierarchical hollow Ni3S2/Co9S8/N-doped carbon composite with superior sodium storage performance
Source: Royal Society of Chemistry journal article supplement (doi:10.1039/c7ta00201g), 2017-01-01
Supplement: c7ta00201g1.pdf [file c7ta00201g1.pdf]

**Electronic Supplementary Information**

**Binary Metal Organic Frameworks Derived Hierarchical Hollow Ni<sub>3</sub>S<sub>2</sub>/Co<sub>9</sub>S<sub>8</sub>/N-doped Carbon Composite with Superior Sodium Storage Performance**

Xinye Liu<sup>a†</sup>, Feng Zou<sup>a†</sup>, Kewei Liu<sup>a</sup>, Zhe Qiang<sup>b</sup>, Clinton J. Taubert<sup>a</sup>, Putu Ustriyana<sup>a</sup>, Bryan D. Vogt<sup>b</sup> and Yu Zhu<sup>\*a</sup>

<sup>a</sup> Department of Polymer Science, University of Akron, Akron, Ohio 44325, United States

<sup>b</sup> Department of Polymer Engineering, University of Akron, Akron, OH, 44325, United States

\*Address correspondence to: Yu Zhu (yu.zhu@uakron.edu)

† These authors contribute equally to this work

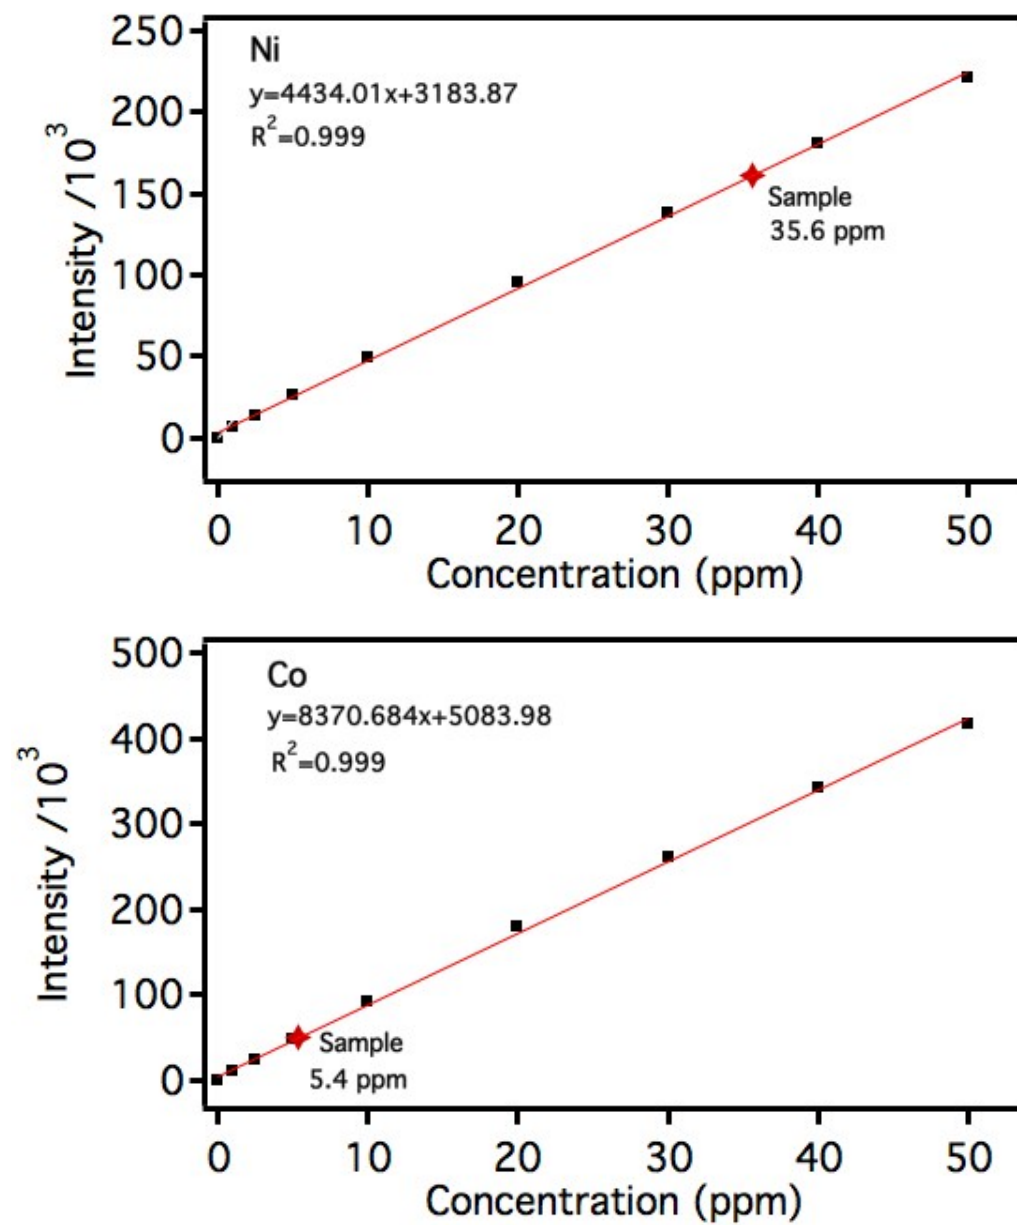

**Figure S1.** ICP test results for Ni and Co elements. The sample was prepared by dissolving 50 mg MOF precursor in 500 ml 4 wt%  $\text{HNO}_3$  (100 ppm).

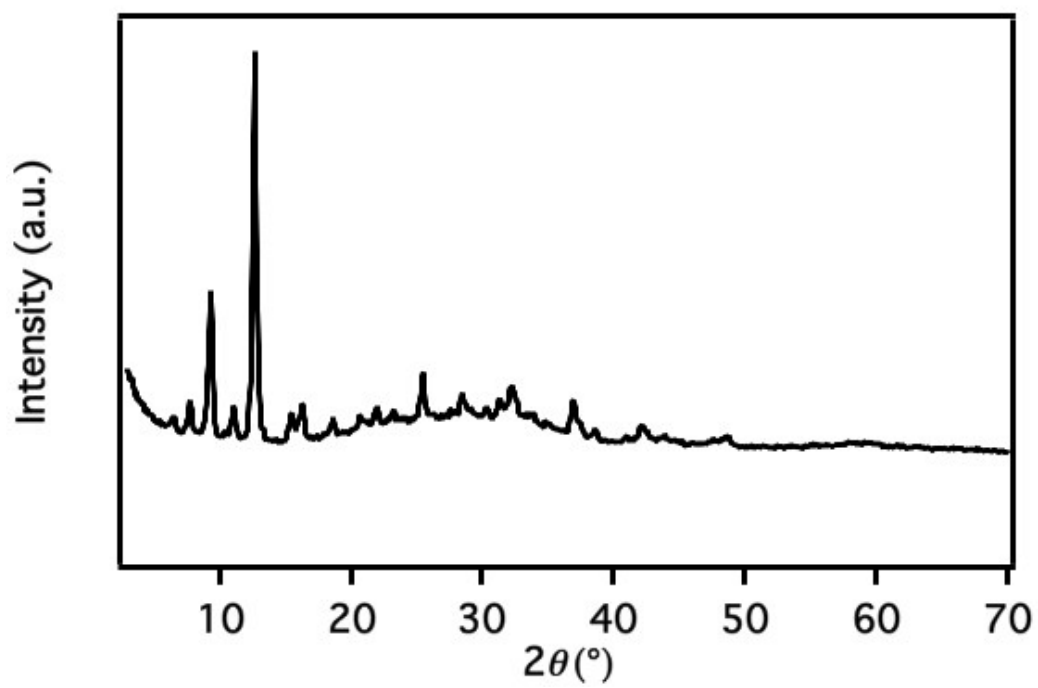

**Figure S2.** XRD pattern of Ni-Co-MOF.

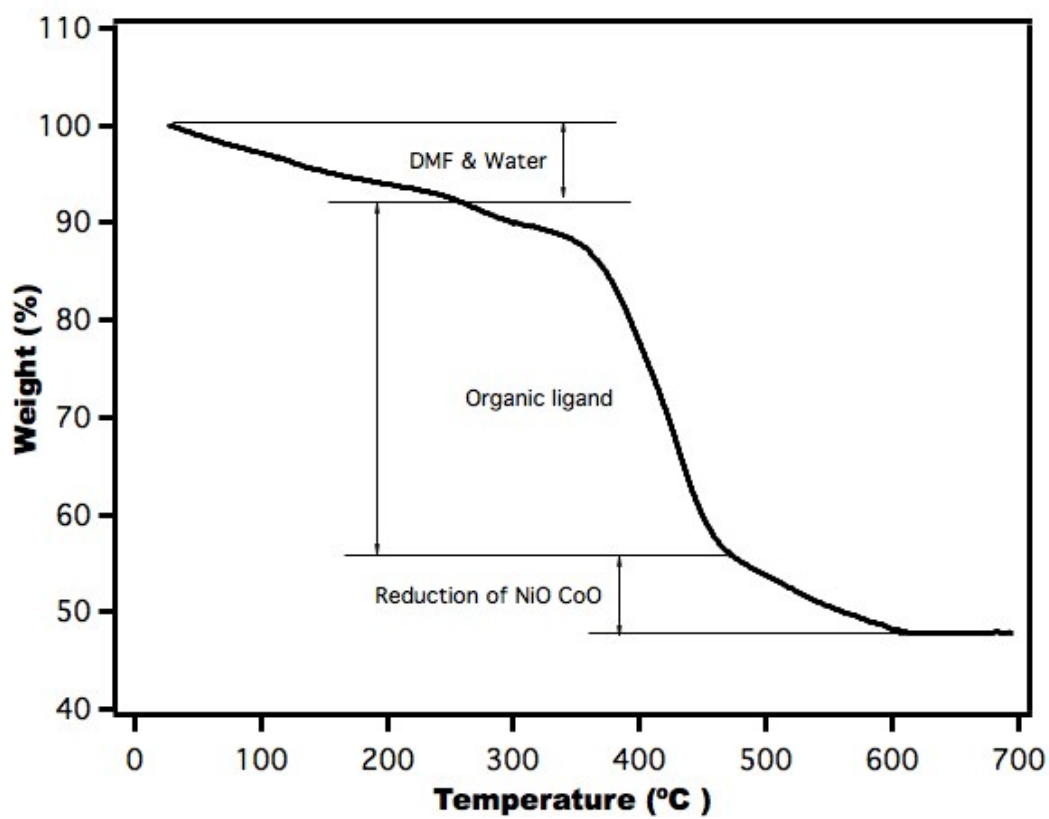

**Figure S3.** TGA of Ni-Co-MOF under N<sub>2</sub> with a temperature ramp rate of 5 °C/min.

DATE 08 02 17 TIME 11 15 58 OPERATOR ID QUICK

RUN 1 ID MSNC1 WEIGHT 1.974

SIGNALS

|                |          |
|----------------|----------|
| CARBON 19.24%  | ZR 8451  |
| HYDROGEN .41%  | NR 9485  |
| NITROGEN 9.19% | CR 15420 |
|                | HR 15906 |

BLANKS 6 133 23  
KFACTORS 15.614 43.562 5.572

OXFILL COMB BOOST1 BOOST2  
3 10 1 0

FILL TIME 22 SECONDS

DATE 08 02 17 TIME 11 20 56 OPERATOR ID QUICK

RUN 2 ID MSNC2 WEIGHT 1.610

SIGNALS

|                |          |
|----------------|----------|
| CARBON 19.34%  | ZR 8449  |
| HYDROGEN .37%  | NR 9307  |
| NITROGEN 9.31% | CR 14174 |
|                | HR 14567 |

BLANKS 6 133 23  
KFACTORS 15.614 43.562 5.572

OXFILL COMB BOOST1 BOOST2  
3 10 1 0

FILL TIME 22 SECONDS

**Figure S4.** CHN analysis results for the Ni<sub>3</sub>S<sub>2</sub>/Co<sub>9</sub>S<sub>8</sub>/N-doped carbon composite

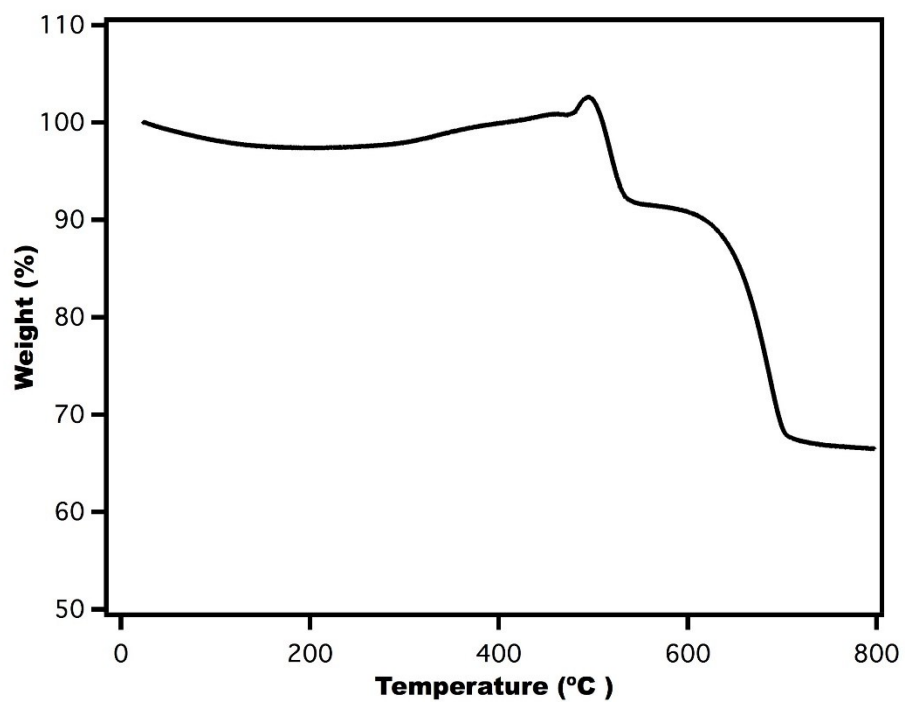

**Figure S5.** TGA of  $\text{Ni}_3\text{S}_2/\text{Co}_9\text{S}_8/\text{N}$ -doped carbon composite under air with a temperature ramp rate of  $5\text{ }^\circ\text{C}/\text{min}$ .

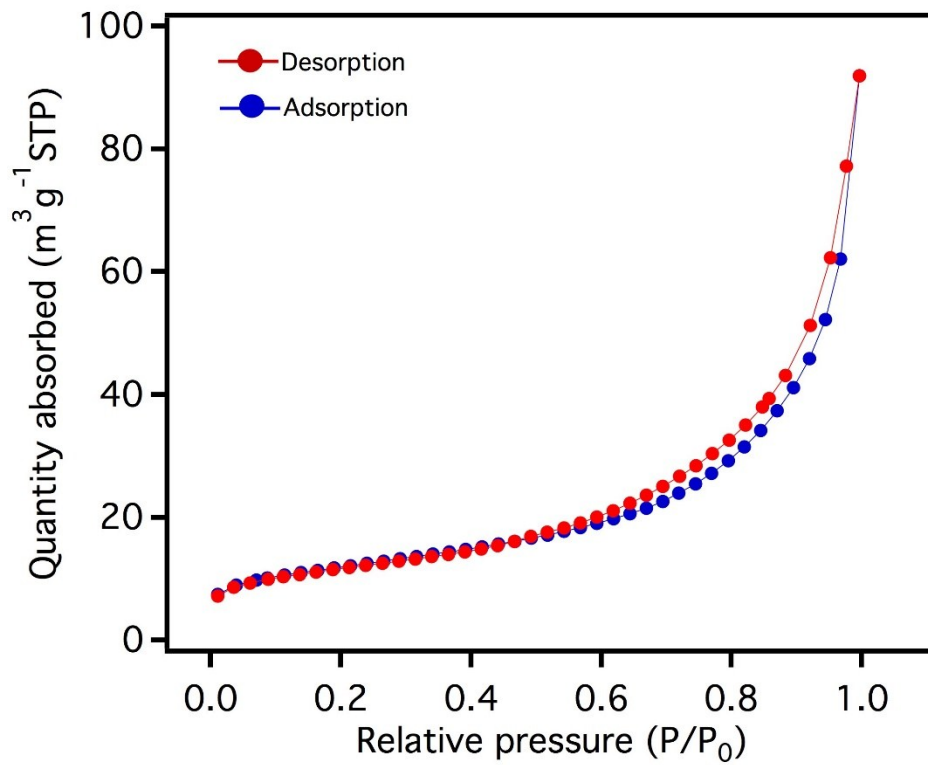

**Figure S6.** Nitrogen adsorption-desorption isotherm of the Ni<sub>3</sub>S<sub>2</sub>/Co<sub>9</sub>S<sub>8</sub>/N-doped carbon composite (BET surface area: 41.5 m<sup>2</sup>g<sup>-1</sup>)

Calculation of crystal sizes based on the Scherrer equation

$$D = \frac{K\lambda}{\beta \cos \theta}$$

D: grain size

K: shape factor, (0.9)

$\lambda$ : X-ray wavelength (nm)

$\beta$ : full width at half the maximum intensity (FWHM)

$\theta$ : Bragg angle

The XRD pattern is shown in Figure 2b. The X-ray wavelength is 1.541 Å. Peak (1-10) of Ni<sub>3</sub>S<sub>2</sub> ( $2\theta=31.245^\circ$ ) and peak (440) of Co<sub>9</sub>S<sub>8</sub> ( $2\theta=52.104^\circ$ ) are used for calculation. The FWHMs are  $0.232^\circ$  and  $0.269^\circ$ , respectively.

For calculation, the FWHMs were converted into radian. The value of  $\beta$  for Ni<sub>3</sub>S<sub>2</sub> and Co<sub>9</sub>S<sub>8</sub> are 0.0040 and 0.0047, respectively.

Based on the Scherrer equation

$$D(\text{Ni}_3\text{S}_2) = \frac{0.9 * 0.154}{0.0040 \cos (15.625)} \text{ nm} = 35.5 \text{ nm}$$

$$D(\text{Co}_9\text{S}_8) = \frac{0.9 * 0.154}{0.0047 \cos (26.052)} \text{ nm} = 32.4 \text{ nm}$$

**Table S1** Sodium storage performance comparison between our work and previous results.

| Reference                | Active Materials      | Current Density (A/g) | Capacity (mAh/g) | Cycles | Retention |
|--------------------------|-----------------------|-----------------------|------------------|--------|-----------|
| Wang et al. <sup>1</sup> | NiS <sub>2</sub> -GNS | 0.08<br>1.6           | 314<br>168       | 200    | 77%       |



|                                                                                                                                                                                                                               |                                                                                          |                                    |                |     |       |
|-------------------------------------------------------------------------------------------------------------------------------------------------------------------------------------------------------------------------------|------------------------------------------------------------------------------------------|------------------------------------|----------------|-----|-------|
| Shang et al. <sup>2</sup>                                                                                                                                                                                                     | Ni <sub>3</sub> S <sub>2</sub> -PEDOT                                                    | 0.6<br>1.2                         | 280<br>310     | 30  | 88%   |
| Pan et al. <sup>3</sup>                                                                                                                                                                                                       | NiS-20rGO                                                                                | Charge<br>0.2<br>Discharge<br>0.05 | 160            | 10  | 88%   |
| Song et al. <sup>4</sup>                                                                                                                                                                                                      | Rod-like<br>Ni <sub>3</sub> S <sub>2</sub> /Ni                                           | 0.05<br>0.8                        | 315.3<br>230   | 100 | 90.6% |
| Kim et al. <sup>5</sup>                                                                                                                                                                                                       | Ni <sub>3</sub> S <sub>2</sub>                                                           | 0.05                               | 342            | 16  | 81%   |
| Qin et al. <sup>6</sup>                                                                                                                                                                                                       | NiS-rGO                                                                                  | 0.1<br>1                           | 391.6<br>346   | 50  | 77.1% |
| Zhang et al. <sup>7</sup>                                                                                                                                                                                                     | Core-shell Co <sub>x</sub> S <sub>y</sub>                                                | 0.5                                | 300            | 50  | 77%   |
| Du et al. <sup>8</sup>                                                                                                                                                                                                        | Co <sub>3</sub> S <sub>4</sub> -PNS/GS                                                   | 0.5<br>2                           | 329<br>307     | 50  | 71    |
| Zhou et al. <sup>9</sup>                                                                                                                                                                                                      | Co <sub>3</sub> S <sub>4</sub> @PANI                                                     | 0.2<br>2                           | 252.5<br>189.3 | 100 | 44%   |
| Ko et al. <sup>10</sup>                                                                                                                                                                                                       | Co <sub>9</sub> S <sub>8</sub> @carbon                                                   | 0.5<br>1.5                         | 404<br>326     | 50  | 80%   |
| Zhang et al. <sup>11</sup>                                                                                                                                                                                                    | CuO/Cu <sub>2</sub> O                                                                    | 0.05<br>1                          | 415<br>217.3   | 50  | /     |
| Feng et al. <sup>12</sup>                                                                                                                                                                                                     | NiO/Ni/Graphene                                                                          | 1<br>2                             | 248<br>207     | 190 | 60%   |
| This work                                                                                                                                                                                                                     | Ni <sub>3</sub> S <sub>2</sub> /Co <sub>9</sub> S <sub>8</sub> /N-doped carbon composite | 0.1<br>2                           | 419.9<br>323.2 | 100 | 98.6% |
| * GNS: graphene nanosheets; PEDOT: poly(3,4-ethylenedioxythiophene); rGO: reduced graphene oxide; Co <sub>3</sub> S <sub>4</sub> -PNS/GS: Co <sub>3</sub> S <sub>4</sub> porous nanosheets/graphene sheets; PANI: polyaniline |                                                                                          |                                    |                |     |       |

## References

1. T. Wang, P. Hu, C. Zhang, H. Du, Z. Zhang, X. Wang, S. Chen, J. Xiong and G. Cui, *ACS Appl. Mater. Interfaces*, 2016, 8, 7811-7817.
2. C. Shang, S. Dong, S. Zhang, P. Hu, C. Zhang and G. Cui, *Electrochem. Comm.*, 2015, 50, 24-27.
3. Q. Pan, J. Xie, T. Zhu, G. Cao, X. Zhao and S. Zhang, *Inorg. Chem.*, 2014, 53, 3511-3518.

4. X. Song, X. Li, Z. Bai, B. Yan, D. Li and X. Sun, *Nano Energy*, 2016, 26, 533-540.
5. J.-S. Kim, H.-J. Ahn, H.-S. Ryu, D.-J. Kim, G.-B. Cho, K.-W. Kim, T.-H. Nam and J. H. Ahn, *J. Power Sources*, 2008, 178, 852-856.
6. W. Qin, T. Chen, T. Lu, D. H. C. Chua and L. Pan, *J. Power Sources*, 2016, 302, 202-209.
7. Z. Zhang, Y. Gan, Y. Lai, X. Shi, W. Chen and J. Li, *RSC Adv.*, 2015, 5, 103410-103413.
8. Y. Du, X. Zhu, X. Zhou, L. Hu, Z. Dai and J. Bao, *J. Mater. Chem. A*, 2015, 3, 6787-6791.
9. Q. Zhou, L. Liu, Z. Huang, L. Yi, X. Wang and G. Cao, *J. Mater. Chem. A*, 2016, 4, 5505-5516.
10. Y. N. Ko and Y. C. Kang, *Carbon*, 2015, 94, 85-90.
11. X. Zhang, W. Qin, D. Li, D. Yan, B. Hu, Z. Sun and L. Pan, *Chem. Commun.*, 2015, 51, 16413-16416.
12. F. Zou, Y. M. Chen, K. Liu, Z. Yu, W. Liang, S. M. Bhaway, M. Gao and Y. Zhu, *ACS Nano*, 2016, 10, 377-386.
